# Supplementary material
Source: Springer Nature journal article supplement (https://www.springermedizin.de/resource/supplementary/12906_2005_94_MOESM3_ESM.pdf/9524004)

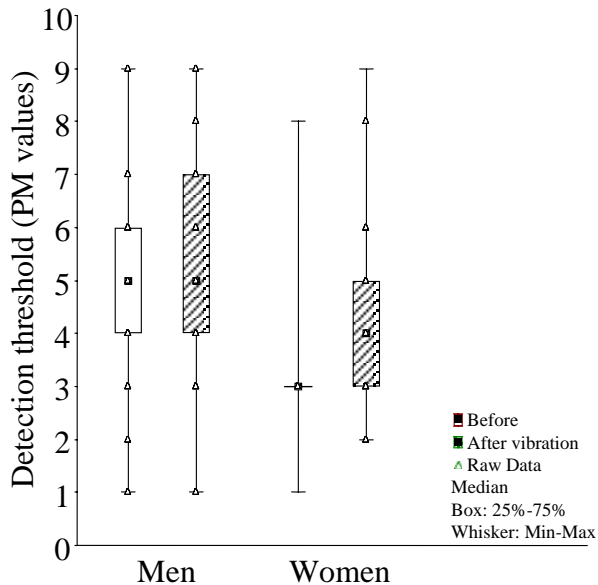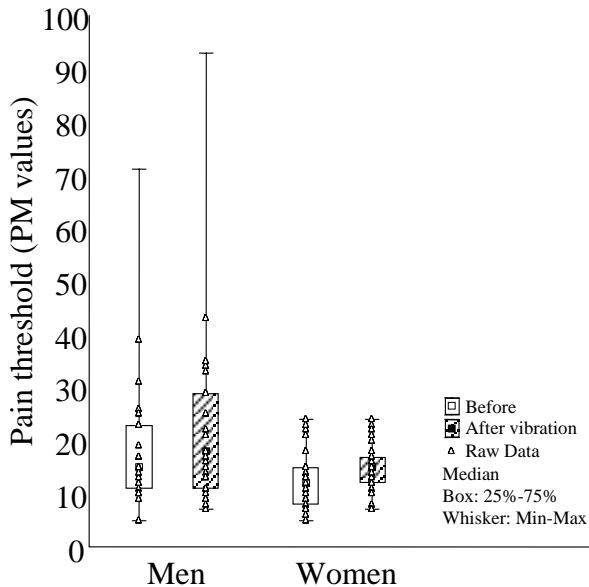

Supplement: MOESM3 [file 9524004]
